# Supplementary material for: Quantitative Sensory Testing in adults with Autism Spectrum Disorders
Source: Springer Nature journal article supplement (doi:10.1007/s10803-017-3041-4), 2017-02-03
Supplement: MOESM1 [file 12044636]

**Supplement**

**1.) Summary of previous somatosensory studies mentioned in the introduction**

| **Study reference** | **Number of ASD participants** | **Results (ASD group)** |
| --- | --- | --- |
| **Vibrotactile perception** | | |
| Blakemore et al., 2006 | Experiment 1: N = 10 (adults) | Experiment 1: Vibro-tactile hypersensitivity (lower tactile perception thresholds at 200 Hz, but not at 30 Hz). |
| Gulcu et al. 2007 | N = 6 (children) | No difference between vibro-tactile thresholds of ASD and healthy children. |
| Cascio et al. 2008 | N = 8 (adults) | Similar vibro-tactile detection thresholds in ASD compared to controls. |
| [Puts et al. 2014](#_ENREF_40) | N = 32 (children) | Raised static detection thresholds and an absence of the effect of a dynamically increasing sub-threshold stimulus on static detection threshold were found in ASD subjects.  ASD participants showed poorer amplitude discrimination as well as decreased adaptation compared to controls.  Frequency discrimination was similar between both groups. |
| [Tavassoli et al. 2015](#_ENREF_51) | N = 21 (children) | Raised static vibro-tactile detection thresholds in ASD. |
| **Perception of touch** | | |
| Blakemore et al., 2006 | Experiment 2: N = 16 (adults) | Experiment 2: Tactile hypersensitivity (ASD individuals rated both self-produced and external touch as more tickly than did the control participants). |
| O’Riordan and Passetti 2006 | Experiment 3: N = 13 (children) | No difference between the two groups in detection of the various degrees of tactile pressure exerted and no difference in tactile discrimination ability. |
| Cascio et al. 2008 | N = 8 (adults) | Von Frey punctate touch detection threshold was similar between ASD and healthy adults. |
| Riquelme et al., 2016 | N = 27 (children) | Increased touch sensitivity in C-tactile afferents innervated areas in ASD compared to controls. |
| **Pain perception** | | |
| Cascio et al. 2008 | N = 8 (adults) | Thermal (heat and cold) pain hypersensitivity in ASD compared to controls. |
| Bird et al. 2010 | N = 18 (adults) | Similar electrical pain detection thresholds in both groups. |
| Fan et al. 2014 | N = 24 (adults) | Lower pressure pain thresholds in ASD compared to controls. |
| Duerden et al. 2015 | N = 20 (adolescents) | Similar thermal pain thresholds in both groups. |
| Yasuda et al. 2016 | N = 15 (adolescents/adults) | Normal pain detection thresholds during thermal (heat/cold) and electrical stimulation in ASD. |
| Riquelme et al., 2016 | N = 27 (children) | Lower pressure pain thresholds in ASD compared to controls. |
| **Thermal perception** | | |
| Cascio et al. 2008 | N = 8 (adults) | No significant group differences between ASD and control subjects  emerged for either cold or warm detection task. |
| Duerden et al. 2015 | N = 20 (adolescents) | Hyposensitivity (loss of sensory function) to innocuous thermal stimuli was found in ASD compared to controls. |
| **Paradoxical heat sensation** | | |
| Duerden et al. 2015 | N = 20 (adolescents) | Paradoxical heat sensation occurred in 6 ASD adolescents. |
| **Texture perception** | | |
| O’Riordan and Passetti 2006 | Experiment 2: N = 12 (children) | No differences between groups in their ability to discriminate between different sandpaper stimuli. |
| Cascio et al. 2008 | N = 8 (adults) | Similar texture hedonic magnitude estimation in ASD compared to controls. |
| **Stereognosis**  **( = ability to perceive and recognize the form of an object in the absence of visual and auditory information, by using tactile information)** | | |
| Riquelme et al., 2016 | N = 27 (children) | Behavioral performance on stereognosis tests did not differ between groups. |
| **Proprioception**  **(=sense of the relative position and movement of body parts)** | | |
| Riquelme et al., 2016 | N = 27 (children) | Task: The sense of the relative position and movement of several parts of the upper arm was assessed as the ability to reproduce passive joint movements. Decreased proprioception scores were found in children with ASD compared to controls. |

**2.) Performance of Quantitative Sensory Testing**

**General information**

QST is a standardized method for evaluating 13 somatosensory responses to thermal, mechanical, vibro-tactile and nociceptive stimuli. Reference data is currently available for hands, feet, face and trunk. It is a subjective, psychophysical method that relies upon the cooperation of the participant.

The approximate duration to apply the QST protocol to one body area accounts for about 30 minutes.

Detailed information on the QST method can be found here: <http://www.neuro.med.tu-muenchen.de/dfns/pdfs/QST-Investigators_brochure_Version_2_1_final_english_2010_07_09.pdf>

For proper QST implementation, a special QST training (duration: 8 hours, costs: please contact the DFNS for further information) and the use of special equipment (e.g. thermode, pin prick equipment etc.) are recommended to ensure the high quality of QST and comparability of QST results (for further information: <http://www.neuro.med.tu-muenchen.de/dfns/arzt/qst_schulung.html>).

It is also advisable to acquire the QST certificate for you lab which also serves as quality assurance and which should be renewed every 3 years. Please find further information on the certification and its costs here:

a) <http://www.neuro.med.tu-muenchen.de/dfns/pdfs/Certification_homepage-Text_QST-e-120619-1.pdf>

b) http://www.paincert.org/fileadmin/PDF/pdf_2016/paincert_Leistungs-_und_Kostenuebersicht_2016.pdf

According to the standardized study protocol, we tried to ensure a fluent, uninterrupted termination of the test. Participants were asked not to take any rest periods during the QST testing. This was achieved by all patients. Rest periods were allowed before and after QST.

Furthermore, patients were asked to keep their eyes closed during the test, which makes it easier to concentrate on the sensory stimulus.

**a) Thermal detection (CDT/WDT), pain thresholds (CPT/HPT) and paradoxical heat sensations (PHS):**

A standard thermode (e.g. Thermal Sensory Analyzer (TSA, Medoc, Israel)) is used to determine cold (CDT) and warm detection threshold (WDT), thermal sensory limen (TSL) and cold (CPT) and heat pain thresholds (HPT) are determined. The thermode - with a baseline temperature of 32 °C and cut-off temperatures of 0 °C and 50 °C - is placed on the test or control area. All thresholds will be obtained with ramped continuously increasing or decreasing thermal stimuli (1 °C/s) that are terminated when the participant presses a button (using the hand, which is not tested). The participant is supposed to press the button when he/she feels the stimulus (starting from the baseline temperature) to get cold (CDT) or warm (WDT) for thermal detection thresholds or when the cold (CPT) or hot (HPT) stimulus turns into a painful stimulus for pain threshold. The average threshold temperature of 3 consecutive measurements is calculated for each of the parameters (interstimulus interval for CDT and WDT: 4-6 seconds, interstimulus interval for CPT/HPT: 10 seconds).

The thermal sensory limen (TSL) is defined as the difference threshold for alternating cool and warm stimuli (again starting from the baseline temperature) and is calculated from the average of 6 measurements. It is applied in order to register paradoxical heat sensations (PHS), meaning that patients and volunteers may report a warm, hot or painfully hot sensation in response to the cold stimulation. The number of PHS is counted as the total out of 3 consecutive measurements.

Location of testing in our study: medial (radial) dorsal left and right hand

**b) Mechanical (tactile) detection thresholds (MDT):**

Using a set of standardized von Frey hairs (0.25, 0.5, 1, 2, 4, 8, 16, 32, 64, 128, 256, and 512 mN), the geometrical mean of the mechanical (tactile) detection threshold (MDT) is determined using a modified method of limits with five series each of increasing and decreasing stimulus intensities. The participant is asked to respond “YES” if he/she feels the tactile stimulus. Starting using the 16mN von Frey hair, subsequently, von Frey hairs of the corresponding next lower intensity (8 mN) are applied until the participant does NOT feel any touch sensation anymore (no answer = subthreshold value). The equivalent force applied represents the first subthreshold stimulus intensity that is to be assessed. Now follows the reversed procedure with ascending stimulus intensities (suprathreshold value). Both procedures are repeated consecutively until a total of 5 sub- and five suprathreshold values have been obtained that represent the turning points for the threshold detection.

Location of testing in our study: medial (radial) dorsal left and right hand

**c) Mechanical pain thresholds (MPT):**

For mechanical pain thresholds (MPT), 7 different pinprick stimulators with standardized stimulus intensities (8, 16, 32, 64, 128, 256, and 512 mN) and contact areas (tip diameter 0.25 mm) are used.

Starting with a stimulation intensity of 8 mN (contact time = 1 second), in each case the next higher pinprick stimulator is placed on the skin until the perception of “pure touch” changes its quality towards an additional “sharp”, “pricking” or “stinging” (painful) impression. The corresponding intensity represents the first suprathreshold value whereas during the decreasing stimulus intensity the first stimulus that is perceived as “blunt” and no longer as being “sharp”, “pricking” or “stinging” determines the subthreshold value. Again employing a modified method of limits, 5 consecutively assessed series each of increasing and decreasing stimulus intensities are conducted and the geometric mean of the mechanical pain threshold is determined.

Location of testing in our study: medial (radial) dorsal left and right hand

**d) Mechanical pain sensitivity (MPS) and dynamic mechanical allodynia (DMA):**

Again, the aforementioned set of 7 pinprick stimulators is used (see c)). Furthermore, 3 stimulators for slight tactile stimuli are employed: a cotton wisp (3 mN), a Q-tip fixed to an elastic strip (100 mN) and a soft brush (between 200 and 400 mN). These needle and tactile stimuli are applied in a balanced order (contact time =1 sec) and the painfulness of each stimulus is then psychometrically recorded by means of a numerical rating scale (between 0 = “no pain” and 100 = “maximum pain imaginable”, ratings with a decimal are accepted). This stimulus/response function allows the conclusion whether hyper- or hypoalgesia (= increased or decreased response to a stimulus which is normally painful) exists in the supra-threshold range. Moreover, one may objectify whether dynamic mechanical allodynia (DMA; = pain due to a stimulus which does not normally provoke pain) is apparent.

Location of testing in our study: medial (radial) dorsal left and right hand

**e) Wind-up ratio**

The 256 mN pinprick stimulator is used on a standardized contact area (tip diameter 0.25 mm). A single stimulus is applied with a pinprick stimulator and shall be rated by the participant on the numerical rating scale (see d)). After 10 seconds a series of 10 stimuli using the same needle stimulator is applied with a frequency of 1/s within the same skin area of about 1 cm2. Again, participant score the pain intensity by means of the numerical scale. A ratio is then calculated by dividing the combined pain rating of the stimulus series by the pain rating of the single stimulus. “Wind-up ratio” (WUR) is defined as the geometrical mean of all 5 ratios of the estimated pain ratings of the single stimuli and the following stimulation series.

Location of testing in our study: medial (radial) dorsal left and right hand

**f) Vibration detection threshold (VDT):**

As compared to the classical neurologic vibration detection test,a tuning fork (64 Hz, 8/8 scale) is placed on a bony prominence within the control and test site. The vibration detection threshold is determined with a series of three consecutively applied decreasing stimulus intensities as the last noticeable vibration.

Location of testing in our study: distal radius (bone protuberance close to the wrist) of left and right hand

**g) Pressure pain threshold (PPT):**

1 blunt mechanical stimulator (contact area 1 cm2 , applicable force 10 kg/1000 kPa/100 N or 20 kg/2000 kPa/200 N, respectively) with a built-in pressure display (pressure algometer) is placed on the skin above pre-defined muscles within the control and test site. To characterize deep muscular pain, the pressure pain threshold is determined by 3 (consecutively applied) continuous ramps of ascending intensity (about 0.5 kg/s corresponding to 50 kPa/s). The participant is instructed to say “NOW” as soon as the sensation of pressure turns into a sensation of “burning”, “stinging”, “drilling” or “aching”.

Location of testing in our study: thenar muscles of left and right hand
